# Supplementary material for: Earthworm inspired lubricant self-pumping hydrogel with sustained lubricity at high loading
Source: PubMed Central journal article supplement — Nat Commun. 2025 Jan 4;16:398. doi: 10.1038/s41467-024-55715-8 (PMC11700183; doi:10.1038/s41467-024-55715-8), 2025-01-04
Supplement: 41467_2024_55715_MOESM2_ESM.pdf [file 41467_2024_55715_MOESM2_ESM.pdf]

## **Description of Additional Supplementary Files**

### **Supplementary Movie 1.**

SL characteristic demonstration of MS-SLH || A weight (200 g) is easy to slide on surface of tilted glass sheets ( $4^\circ$ ) equipped with MS-SLH sheet.

### **Supplementary Movie 2.**

SL characteristic absence of control DN hydrogel || A weight (200 g) is difficult to slide on surface of tilted glass sheets ( $13^\circ$ ) equipped with textured DN hydrogel sheet without dissociated-lubrication layer.

### **Supplementary Movie 3.**

Load-bearing capacity demonstration of MS-SLH || The home-made mechanical loading-monitoring system is manufactured to visually show the mechanically robust SL characteristic of MS-SLH.

### **Supplementary Movie 4.**

Sustained lubrication characteristic demonstration of MS-SLH || The home-made mechanical monitoring system is manufactured to verify long-lasting lubrication feature of MS-SLH.
